# Supplementary material for: Response of Extremely Small Populations to Climate Change—A Case of Trachycarpus nanus in Yunnan, China
Source: MDPI journal article supplement (doi:10.3390/biology13040240), 2024-04-05
Supplement: s1 [file s1]

**Table S1.** Alternation trends in the longitude, latitude, and altitude of *T. nanus* during different periods.

| Period         | Longitude / (°) | Latitude / (°) | Altitude / (m) |
|----------------|-----------------|----------------|----------------|
| LIG            | 101.313013      | 25.442303      | 2541           |
| LGM            | 101.491190      | 25.479192      | 2044           |
| MH             | 101.381510      | 25.494053      | 2287           |
| Current        | 101.354827      | 25.549136      | 2251           |
| 2030s-SSP1-2.6 | 101.361941      | 25.434287      | 2450           |
| 2030s-SSP2-4.5 | 101.454690      | 25.522029      | 2620           |
| 2030s-SSP5-8.5 | 101.345316      | 25.472278      | 2518           |
| 2050s-SSP1-2.6 | 101.410700      | 25.434495      | 2578           |
| 2050s-SSP2-4.5 | 101.287877      | 25.526486      | 1969           |
| 2050s-SSP5-8.5 | 101.317942      | 25.457604      | 2658           |
| 2070s-SSP1-2.6 | 101.382936      | 25.480248      | 2305           |
| 2070s-SSP2-4.5 | 101.276269      | 25.454919      | 2261           |
| 2070s-SSP5-8.5 | 101.378872      | 25.466853      | 2311           |
| 2090s-SSP1-2.6 | 101.328259      | 25.524572      | 2445           |
| 2090s-SSP2-4.5 | 101.320784      | 25.436330      | 2502           |
| 2090s-SSP5-8.5 | 101.514749      | 25.377763      | 1887           |
