# Supplementary material for: Response of Extremely Small Populations to Climate Change—A Case of Trachycarpus nanus in Yunnan, China
Source: MDPI journal article supplement (doi:10.3390/biology13040240), 2024-04-05
Supplement: s1 [file s1]

**Table S2.** Migration distance of the centroid in the past and under different scenarios in the future.

| Type     | Period        | Migration distance / Km |
|----------|---------------|-------------------------|
| Past     | LIG–LGM       | 17.71                   |
|          | LGM–MH        | 10.72                   |
|          | MH–Current    | 6.86                    |
| SSP1-2.6 | Current–2030s | 13.28                   |
|          | 2030s–2050s   | 4.71                    |
|          | 2050s–2070s   | 5.92                    |
|          | 2070s–2090s   | 7.35                    |
| SSP2-4.5 | Current–2030s | 10.13                   |
|          | 2030s–2050s   | 16.10                   |
|          | 2050s–2070s   | 8.34                    |
|          | 2070s–2090s   | 4.80                    |
| SSP5-8.5 | Current–2030s | 8.92                    |
|          | 2030s–2050s   | 3.14                    |
|          | 2050s–2070s   | 5.98                    |
|          | 2070s–2090s   | 16.67                   |
